# Supplementary material for: Improving an Industrial Sherry Base Wine by Yeast Enhancement Strategies
Source: MDPI journal article supplement (doi:10.3390/foods11081104), 2022-04-12
Supplement: s1 [file s1]

# Improving an Industrial Sherry Base Wine by Yeast Enhancement Strategies

Marina Ruiz-Muñoz <sup>1</sup>, Gustavo Cordero-Bueso <sup>1,\*</sup>, Pedro Miguel Izquierdo-Cañas <sup>2,3</sup>, Adela Mena-Morales <sup>2</sup> and Jesús M. Cantoral <sup>1</sup>

<sup>1</sup> Departamento de Biomedicina, Biotecnología y Salud Pública, Universidad de Cádiz, Avenida República Árabe Saharaui s/n, Puerto Real, 11510 Cadiz, Spain; marina.ruiz@uca.es (M.R.-M.); jesusmanuel.cantoral@uca.es (J.M.C.)

<sup>2</sup> Instituto Regional de Investigación y Desarrollo Agroalimentario y Forestal de Castilla-La Mancha (IRIAF), IVICAM. Ctra. Albacete s/n, Tomelloso, 13700 Ciudad Real, Spain; pmizquierdo@jccm.es (P.M.I.-C.); amenam@jccm.es (A.M.-M.)

<sup>3</sup> Parque Científico y Tecnológico de Castilla-La Mancha, Paseo de la Innovación 1, 02006 Albacete, Spain

\* Correspondence: gustavo.cordero@uca.es

**Table S1.** Phenotypic characteristics of parental yeast strains (UCA-Y-001 and CLI-S).

| <b>Fermentation</b>           | <b>UCA-Y-001</b> | <b>CLI-S</b> |
|-------------------------------|------------------|--------------|
| D-Glucose                     | +                | +            |
| D-Galactose                   | -/w              | +            |
| Lactose                       | w                | -            |
| Maltose                       | +                | +            |
| Sucrose                       | +                | +            |
| Melibiose                     | +                | +            |
| Raffinose                     | +                | +            |
| Trehalose                     | w                | -            |
| <b>Assimilation</b>           | <b>UCA-Y-001</b> | <b>CLI-S</b> |
| D-Glucose                     | +                | +            |
| D-Galactose                   | -                | +            |
| Lactose                       | -                | -            |
| Maltose                       | +                | +            |
| Sucrose                       | +                | +            |
| Melibiose                     | -                | -            |
| Raffinose                     | +                | +            |
| Inulin                        | +                | +            |
| Cellobiose                    | -                | -            |
| Trehalose                     | w                | -            |
| Melezitose                    | +                | -            |
| Methyl- $\alpha$ -D-Glucoside | -                | -            |
| Soluble Starch                | -                | -            |
| Salicin                       | -                | -            |
| L-Rhamnose                    | -                | -            |
| L-Sorbose                     | w                | -            |
| D-Xylose                      | w                | -            |
| L-Arabinose                   | -                | -            |
| D-Arabinose                   | -                | -            |
| D-Ribose                      | w                | -            |
| Methanol                      | -                | -            |
| Ethanol 8%                    | +                | +            |
| Ethanol 10%                   | +                | +            |
| Ethanol 11%                   | -                | +            |
| Ethanol 14%                   | -                | w            |

|                                          |                           |                           |
|------------------------------------------|---------------------------|---------------------------|
| Glycerol                                 | -                         | -                         |
| Erythritol                               | -                         | w                         |
| Cadaverine                               | -                         | -                         |
| Ethylamine                               | +w                        | -                         |
| Galactitol                               | -                         | -                         |
| D-Manitol                                | -                         | -                         |
| D-Glucitol                               | -                         | -                         |
| Myo-inositol                             | -                         | -                         |
| D-L-Lactate                              | -                         | -                         |
| Succinate                                | -                         | -                         |
| Citrate                                  | -                         | -                         |
| D-Gluconate                              | -                         | +w                        |
| D-Glucosamine                            | +                         | -                         |
| N-Acetyl Glucosamine                     | -                         | -                         |
| Hexadecane                               | -                         | -                         |
| L-Lysine                                 | -                         | -                         |
| Nitrate                                  | +                         | +                         |
| Nitrite                                  | w                         | w                         |
| 2-Keto-D-gluconate                       | -w                        | -                         |
| L-Arabinitol                             | -                         | -                         |
| Arbutine                                 | -                         | -                         |
| Propane 1,2-diol                         | -                         | -                         |
| Butane 2,3-diol                          | -                         | -                         |
| Creatinine                               | +                         | -                         |
| Urease                                   | +w                        | -                         |
| <b>Growth</b>                            | <b>UCA-Y-001</b>          | <b>CLI-S</b>              |
| Cycloheximide 1000 ppm                   | -                         | -                         |
| Cycloheximide 100 ppm                    | -                         | -                         |
| 50% Glucose                              | -                         | -                         |
| 10% NaCl                                 | +                         | -                         |
| 16% NaCl                                 | -                         | -                         |
| pH 3                                     | +                         | +                         |
| pH 9.5                                   | -                         | +                         |
| YM broth at 25°C, 3 days                 | +                         | +                         |
| YPD broth at 28°C, 3 days                | +                         | +                         |
| YPD broth at 37°C, 3 days                | -                         | +                         |
| YPD broth at 17°C, 3 days                | +                         | +                         |
| YPD broth at 13°C, 3 days                | +                         | -                         |
| Cellular reproduction                    | Asymmetrically by budding | Asymmetrically by budding |
| Pseudohyphae or true hyphae formation    | Not Formed                | Not Formed                |
| Sporulation                              | Yes (2:2)                 | Yes (2:4)                 |
| H <sub>2</sub> S/L (µg)                  | 3.06                      | 0.04                      |
| Biggy agar phenotype                     | Dark brown                | white                     |
| Killer phenotype (K)                     | K-positive                | K-positive                |
| Fermentative capacity                    | 12.9                      | 12.8                      |
| Volatile acidity(g/L; acetic acid)       | 0.7                       | 0.4                       |
| Titrateable acidity (g/L; tartaric acid) | 1.89                      | 2.75                      |
| Citric acid                              | nd                        | 0.31                      |
| Malic acid                               | nd                        | 2.82                      |
| Lactic acid                              | nd                        | 0.59                      |
| Acetic acid                              | nd                        | 0.17                      |
| Succinic acid                            | nd                        | 0.29                      |
| Glycerol (g/L)                           | 8.6                       | 7                         |
| 2,3-butanediol (mg/L)                    | 441                       | 373                       |
| Killer phenotype (K)                     | K-positive                | K-positive                |
| Acetaldehyde (mg/L)                      | nd                        | 50.75                     |
| Acetoin (mg/L)                           | nd                        | tr                        |

|                               |    |        |
|-------------------------------|----|--------|
| Ethyl acetate (mg/L)          | nd | 68.71  |
| Higher major alcohols (mg/L): |    |        |
| 1-Propanol                    | nd | 35.02  |
| Isobutanol                    | nd | 37.39  |
| Isoamyl alcohols              | nd | 175.23 |
| 1-Hexanol                     | nd | 0.81   |
| 2-Phenylethanol               | nd | 10.79  |
| Isobutyl acetate              | nd | 0.16   |
| Isoamyl acetate               | nd | 7.66   |
| Hexyl acetate                 | nd | 0.14   |
| Phenyl ethyl acetate          | nd | 0.56   |
| Ethyl butyrate                | nd | 0.33   |
| Ethyl hexanoate               | nd | 0.60   |
| Ethyl octanoate               | nd | 1.01   |
| Ethyl decanoate               | nd | 0.08   |
| Ethyl lactate (mg/L)          | nd | tr     |
| Diethyl succinate (mg/L)      | nd | 0.03   |
| SCFA (mg/L):                  |    |        |
| Isobutyric acid               | nd | 3.01   |
| Butyric acid                  | nd | 1.90   |
| Isovaleric acid               | nd | 0.08   |
| Hexanoic acid                 | nd | 4.97   |
| Octanoic acid                 | nd | 6.11   |
| Decanoic acid                 | nd | 3.70   |
| 4-vinylguaiacol               | nd | 0.47   |

**Table S2.** Concentration of volatile compounds in Palomino Fino white wines fermented with the different yeast strains used in this study (UCA-Y-001 as control; EVO-20, HYB-470 and HYB-492).

|                                       | UCA-Y-001            | EVO-20                | HYB-470              | HYB-492              |
|---------------------------------------|----------------------|-----------------------|----------------------|----------------------|
| Ethyl Acetate <sup>1</sup>            | 65.98 ± 0.65         | 66.84 ± 3.40          | 54.35 ± 5.40         | 66.84 ± 6.14         |
| Isoamyl Acetate <sup>1</sup>          | 4.51 ± 0.05          | 4.30 ± 0.30           | 2.97 ± 0.02          | 1.27 ± 0.02          |
| Hexyl Acetate <sup>2</sup>            | 35.23 ± 8.20         | 22.60 ± 4.82          | 21.90 ± 1.97         | 21.28 ± 4.03         |
| 2-phenylethyl Acetate <sup>2</sup>    | 186.65 ± 17.42       | 252.50 ± 30.06        | 296.11 ± 5.97        | 286.33 ± 91.81       |
| Ethyl Lactate <sup>1</sup>            | 19.59 ± 0.93         | 17.84 ± 0.89          | 25.45 ± 3.33         | 25.77 ± 10.56        |
| Ethyl Butyrate <sup>2</sup>           | 411.00 ± 25.46       | 281.50 ± 4.95         | 174.50 ± 4.24        | 302.00 ± 35.36       |
| Ethyl Hexanoate <sup>1</sup>          | 1.69 ± 0.08          | 0.71 ± 0.03           | 0.64 ± 0.07          | 0.93 ± 0.13          |
| Ethyl Octanoate <sup>1</sup>          | 2.00 ± 0.43          | 1.09 ± 0.03           | 1.05 ± 0.11          | 1.46 ± 0.20          |
| Ethyl Decanoate <sup>2</sup>          | 385.49 ± 27.56       | 312.26 ± 105.27       | 464.02 ± 29.73       | 564.51 ± 46.12       |
| Ethyl Dodecanoate <sup>2</sup>        | 18.02 ± 1.59         | 27.28 ± 5.41          | 62.47 ± 1.15         | 48.87 ± 8.52         |
| Ethyl Hexadecanoate <sup>2</sup>      | 20.12 ± 3.28         | 13.19 ± 4.02          | 55.77 ± 6.97         | 26.46 ± 6.35         |
| Diethyl Succinate <sup>2</sup>        | 70.43 ± 3.97         | 119.22 ± 9.94         | 216.56 ± 20.49       | 134.21 ± 24.52       |
| <b>Esters <sup>1</sup></b>            | <b>94.90 ± 1.26</b>  | <b>91.81 ± 4.45</b>   | <b>85.96 ± 3.46</b>  | <b>97.55 ± 16.68</b> |
| Isoamyl Alcohols <sup>1</sup>         | 174.47 ± 1.36        | 196.11 ± 12.69        | 236.83 ± 8.08        | 184.44 ± 30.36       |
| Methanol <sup>1</sup>                 | 68.84 ± 4.19         | 61.26 ± 2.99          | 69.34 ± 3.84         | 75.88 ± 20.33        |
| 1-propanol <sup>1</sup>               | 62.96 ± 2.60         | 56.08 ± 3.02          | 56.86 ± 1.97         | 53.73 ± 11.25        |
| Isobutanol <sup>1</sup>               | 27.97 ± 0.28         | 35.01 ± 1.99          | 36.84 ± 2.86         | 41.64 ± 8.95         |
| 1-butanol <sup>1</sup>                | 0.90 ± 0.07          | 1.23 ± 0.03           | 1.38 ± 0.29          | 1.49 ± 0.32          |
| 1-pentanol <sup>2</sup>               | 30.79 ± 2.94         | 24.65 ± 6.30          | 26.68 ± 2.83         | 28.35 ± 6.40         |
| 1-hexanol <sup>1</sup>                | 0.95 ± 0.07          | 1.09 ± 0.13           | 1.02 ± 0.09          | 1.09 ± 0.22          |
| t-2-hexenol                           | 4.92 ± 0.97          | 0.77 ± 0.23           | 1.37 ± 0.24          | 0.45 ± 0.17          |
| c-2-hexenol                           | 4.79 ± 1.12          | 6.31 ± 1.56           | 6.05 ± 0.38          | 7.97 ± 0.54          |
| 3-etoxy-1-propanol                    | 79.08 ± 7.03         | 53.10 ± 8.61          | 24.72 ± 3.83         | 20.44 ± 2.97         |
| Benzyl Alcohol                        | 46.82 ± 4.21         | 67.91 ± 7.35          | 80.22 ± 5.71         | 70.41 ± 6.92         |
| 2-phenylethanol <sup>1</sup>          | 9.24 ± 0.93          | 13.56 ± 3.33          | 17.66 ± 4.14         | 12.71 ± 1.85         |
| <b>Alcohols <sup>1</sup></b>          | <b>345.50 ± 6.94</b> | <b>364.51 ± 17.27</b> | <b>420.08 ± 7.10</b> | <b>371.10 ± 7.82</b> |
| Isobutyric Acid                       | 191.02 ± 19.99       | 168.26 ± 35.32        | 229.625 ± 49.43      | 351.80 ± 68.87       |
| Butyric Acid <sup>1</sup>             | 1.56 ± 0.12          | 0.76 ± 0.04           | 0.69 ± 0.10          | 1.35 ± 0.35          |
| Isovaleric Acid <sup>1</sup>          | 0.40 ± 0.11          | 0.33 ± 0.05           | 1.06 ± 0.09          | 0.64 ± 0.05          |
| Valeric Acid                          | 50.52 ± 4.81         | 5.82 ± 0.67           | 10.81 ± 1.89         | 12.18 ± 3.12         |
| Hexanoic Acid <sup>1</sup>            | 19.28 ± 1.03         | 9.33 ± 0.78           | 14.96 ± 0.34         | 19.05 ± 2.53         |
| Octanoic Acid <sup>1</sup>            | 28.55 ± 2.59         | 19.90 ± 2.02          | 25.17 ± 0.37         | 31.94 ± 2.25         |
| Decanoic Acid <sup>1</sup>            | 3.26 ± 0.98          | 5.91 ± 0.28           | 11.09 ± 0.62         | 9.00 ± 1.55          |
| <b>Acids <sup>1</sup></b>             | <b>53.30 ± 0.37</b>  | <b>36.40 ± 1.57</b>   | <b>52.94 ± 0.62</b>  | <b>62.35 ± 1.60</b>  |
| Acetaldehyde <sup>1</sup>             | 15.58 ± 2.20         | 18.01 ± 0.06          | 50.11 ± 0.12         | 60.06 ± 21.08        |
| Benzaldehyde <sup>2</sup>             | 7.84 ± 1.94          | 5.12 ± 0.76           | 5.23 ± 0.79          | 5.64 ± 0.50          |
| <b>Cabonyl Compounds <sup>1</sup></b> | <b>15.59 ± 2.20</b>  | <b>18.01 ± 0.06</b>   | <b>50.13 ± 0.12</b>  | <b>45.07 ± 21.08</b> |
| Linalool <sup>2</sup>                 | 8.33 ± 1.04          | 11.83 ± 0.78          | 14.79 ± 3.61         | 14.07 ± 3.37         |
| Citronellol <sup>2</sup>              | 1.03 ± 0.25          | 1.50 ± 0.41           | 2.16 ± 1.11          | 3.96 ± 1.30          |
| Nerol <sup>2</sup>                    | 0.31 ± 0.16          | 0.63 ± 0.31           | 0.75 ± 0.10          | 0.81 ± 0.16          |
| Geraniol <sup>2</sup>                 | 3.29 ± 0.84          | 7.47 ± 1.47           | 8.42 ± 1.44          | 7.40 ± 1.00          |
| alfa-terpineol <sup>2</sup>           | 4.23 ± 0.47          | 6.07 ± 0.69           | 7.95 ± 0.91          | 7.91 ± 0.99          |
| Thymol <sup>2</sup>                   | 1.50 ± 0.53          | 1.01 ± 0.41           | 1.31 ± 0.23          | 1.16 ± 0.20          |
| <b>Terpenes <sup>2</sup></b>          | <b>18.67 ± 0.91</b>  | <b>28.51 ± 2.64</b>   | <b>35.39 ± 3.17</b>  | <b>35.30 ± 2.03</b>  |
| Damascenone <sup>2</sup>              | 2.96 ± 0.80          | 4.38 ± 0.57           | 6.45 ± 0.72          | 5.95 ± 1.03          |
| beta-ionone <sup>2</sup>              | 0.06 ± 0.02          | 0.11 ± 0.01           | 0.13 ± 0.03          | 0.10 ± 0.00          |
| 3-oxo-a-ionol <sup>2</sup>            | 62.31 ± 4.25         | 34.51 ± 4.23          | 30.94 ± 0.77         | 60.10 ± 3.50         |
| <b>Norisoprenoids <sup>2</sup></b>    | <b>65.32 ± 3.43</b>  | <b>39.00 ± 4.79</b>   | <b>37.52 ± 1.46</b>  | <b>66.15 ± 2.47</b>  |
| g-butirolactone <sup>1</sup>          | 0.81 ± 0.04          | 0.98 ± 0.08           | 0.38 ± 0.03          | 0.38 ± 0.05          |
| g-octalactone <sup>2</sup>            | 1.18 ± 0.26          | 0.82 ± 0.25           | 1.74 ± 0.18          | 1.01 ± 0.21          |
| d-octalactone <sup>2</sup>            | 22.94 ± 2.54         | 21.05 ± 3.17          | 18.72 ± 3.30         | 12.58 ± 4.62         |
| d-dodecalactone <sup>2</sup>          | 26.68 ± 6.27         | 28.74 ± 7.75          | 38.28 ± 4.80         | 31.90 ± 5.56         |
| <b>Lactones <sup>1</sup></b>          | <b>0.86 ± 0.04</b>   | <b>1.03 ± 0.07</b>    | <b>0.44 ± 0.03</b>   | <b>0.43 ± 0.06</b>   |
| 3-methyl-thio-propanol <sup>2</sup>   | 58.64 ± 4.54         | 103.09 ± 5.49         | 237.28 ± 11.06       | 146.16 ± 35.38       |

|                                              |                     |                      |                       |                       |
|----------------------------------------------|---------------------|----------------------|-----------------------|-----------------------|
| 3-ethyl-thio-propanol <sup>2</sup>           | 1.03 ± 0.39         | 7.72 ± 0.59          | 18.69 ± 0.32          | 8.37 ± 0.94           |
| <b>Thioalcohols <sup>2</sup></b>             | <b>59.67 ± 4.93</b> | <b>110.81 ± 6.08</b> | <b>255.97 ± 10.74</b> | <b>154.52 ± 36.32</b> |
| 4-methyl-2,6-ditercbutyl-phenol <sup>2</sup> | 48.31 ± 4.54        | 22.16 ± 2.99         | 83.43 ± 4.30          | 31.99 ± 7.36          |
| Phenol <sup>2</sup>                          | 2.82 ± 1.00         | 1.50 ± 0.42          | 1.45 ± 0.65           | 1.62 ± 0.59           |
| 4-vinyl guaiacol <sup>1</sup>                | 0.49 ± 0.13         | 0.56 ± 0.08          | 1.05 ± 0.08           | 19.23 ± 2.62          |
| 4-vinyl phenol <sup>2</sup>                  | 7.21 ± 1.67         | 1.89 ± 0.53          | 2.16 ± 0.36           | 7.24 ± 1.74           |
| Tyrosol <sup>1</sup>                         | 4.75 ± 0.34         | 3.60 ± 0.17          | 5.57 ± 0.77           | 3.24 ± 0.48           |
| <b>Phenols <sup>1</sup></b>                  | <b>5.30 ± 0.48</b>  | <b>4.19 ± 0.10</b>   | <b>5.54 ± 0.69</b>    | <b>2.25 ± 2.13</b>    |

Mean values ± standard deviation expressed as <sup>1</sup> mg/l or <sup>2</sup> µg/l.
